# Prize Crossword

N.A. Davies

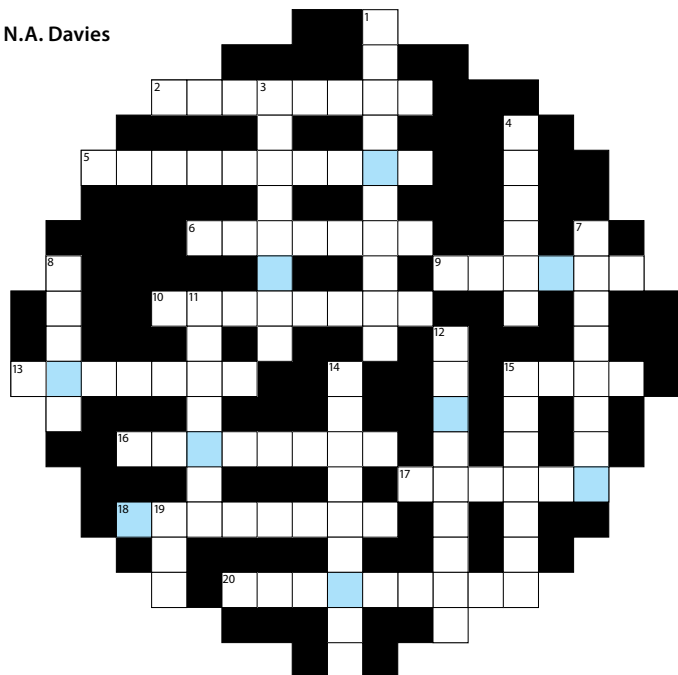

## Across

2. Intersection (8)
5. Nutrient mix for plant productivity (10)
6. Personal behaviour, department (7)
9. With four leaves to be lucky (6)
10. Specific protein molecule on the cell surface (8)
13. Vegetable family with pods (7)
15. To cut off the ends or the top part (4)
16. Device to produce electricity by oxidising e.g. hydrogen (4,4)
17. That which indicates, warns, directs or commands (6)
18. Atomic weight 14.0067 (8)
20. Capable of becoming (9)

## Down

1. Fermentation vessel to synthesise or convert (10)
3. Shape of a nanotube (8)
4. \_\_\_\_\_ credit giving the right to release emissions (6)
7. Relating to the function unit of the central nervous system (8)
8. German Nobel prize winning chemist in 1918 (5)
11. Hot part of a kettle (7)
12. Living in an interdependent relationship (9)
14. Name of a class of molecules representing the third form of pure carbon after diamond and graphite (9)
15. Also known as La Manche (7)
19. Made by losing or gaining an electron (3)

Solutions to the crossword featured in the June 2019 issue are: **Across:** 5. Unnatural, 7. Storage, 8. Drug, 9. Microfluidics, 13. Nano, 14. Genetic, 15. Directed, 17. Industrial, 18. Engineer. **Down:** 1. Synthetic, 2. Expression, 3. Containment, 4. Evolution, 6. Life, 7. Structures, 10. Logic gate, 11. Chip, 12. Abiotic, 15. Design, 16. Data.

## Crossword Competition

### Win

This issue's crossword prize is an Eco Friendly Reusable Bamboo Travel Coffee Mug and a copy of *The Periodic Table* by Primo Levi (Paperback). Simply email the missing word, made up from letters in the highlighted boxes to [biochemist@biochemistry.org](mailto:biochemist@biochemistry.org), by Monday 2 September.

Please include the words 'August crossword competition' in the email subject line.

### Congratulations to the winner of the June competition:

**Clemency Tilley, University of Nottingham**

The missing word from last issue's competition was PLASMID. Clemency received an Advanced miniDNA 12 Base pair Model Kit.

Terms and conditions: only one entry per person, closing date Monday 2 September 2019. The winner will be drawn independently at random from the correct entries received. The winner will receive an Eco Friendly Reusable Bamboo Travel Coffee Mug and a copy of *The Periodic Table* by Primo Levi (Paperback). No cash alternative available. No employee, agent, affiliate, officer or director of Portland Press Limited or the Biochemical Society is eligible to enter. The winner will be notified by email within 7 days of the draw. The name of the winner will be announced in the next issue of *The Biochemist*. The promoter accepts no responsibility for lost or delayed entries. Promoter: Biochemical Society, 5th Floor, 90 High Holborn, London, WC1V 6LJ; do not send entries to this address.

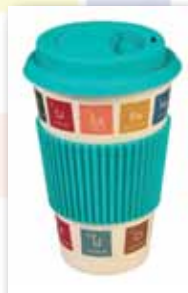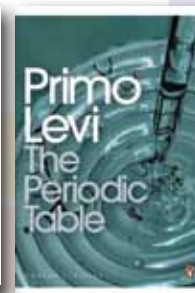

Source: https://port.silverchair.com/biochemist/article-pdf/41/4/68/856234/bio041040068.pdf
